# Supplementary material
Source: PubMed Central journal article supplement (PMC3083182)
Supplement: supp_M110.209296_jbc.M110.209296-1.pdf [file supp_M110.209296_jbc.M110.209296-1.pdf]

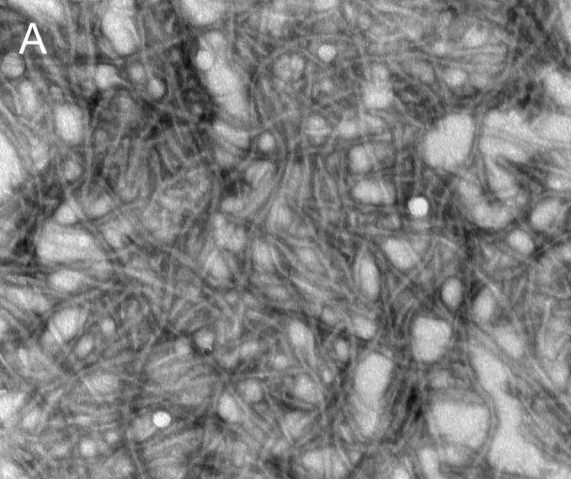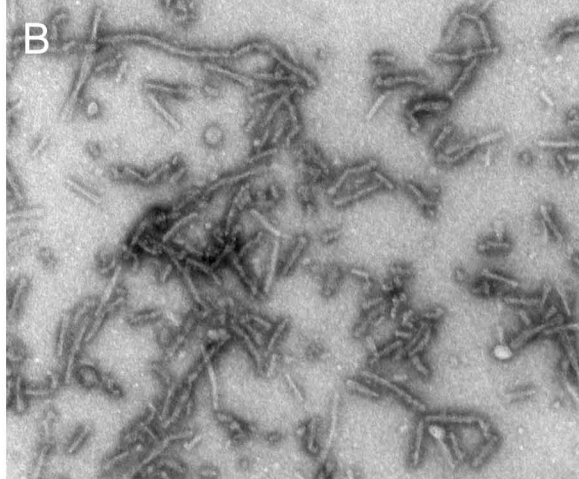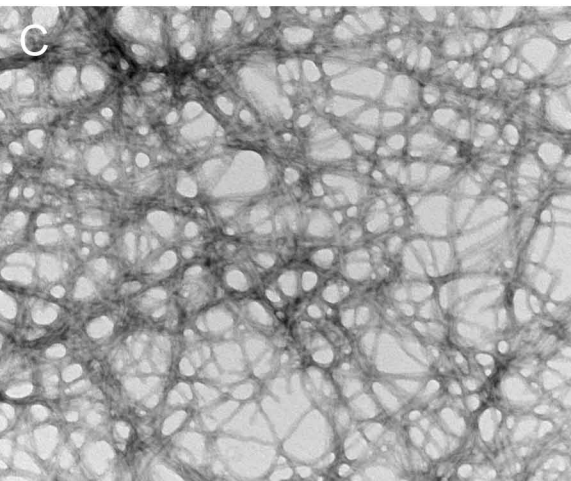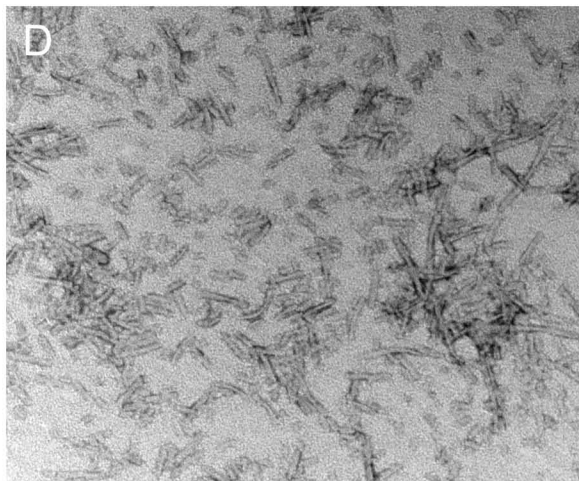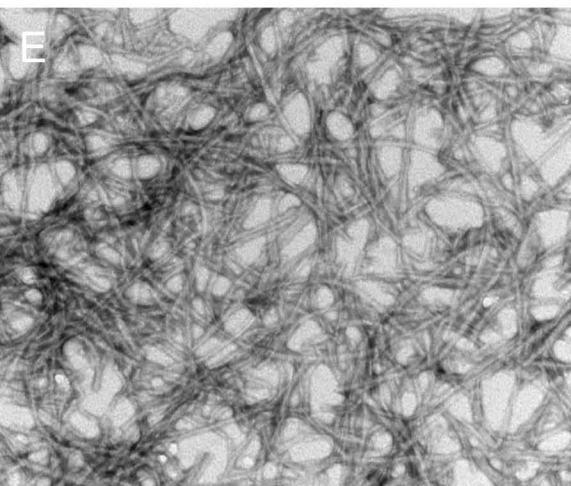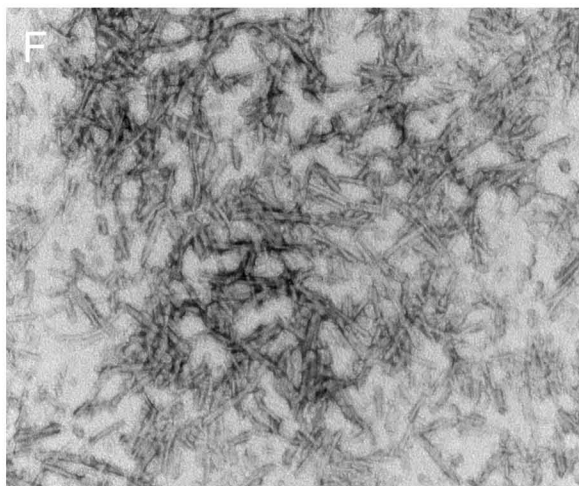

**Supplementary figure 1.** Negative stained transmission electron microscopy of preformed fibrils composed of recombinant myc-T40 (**A** and **B**), myc-K18 (**C** and **D**), or myc-K18/P301L (**E** and **F**). (**A**), (**C**) and (**E**) show unsonicated fibril preparation; (**B**), (**D**) and (**F**) show sonicated fibrils used for transduction experiments. Magnification: 100,000x. Scale bar: 200 nm.

A

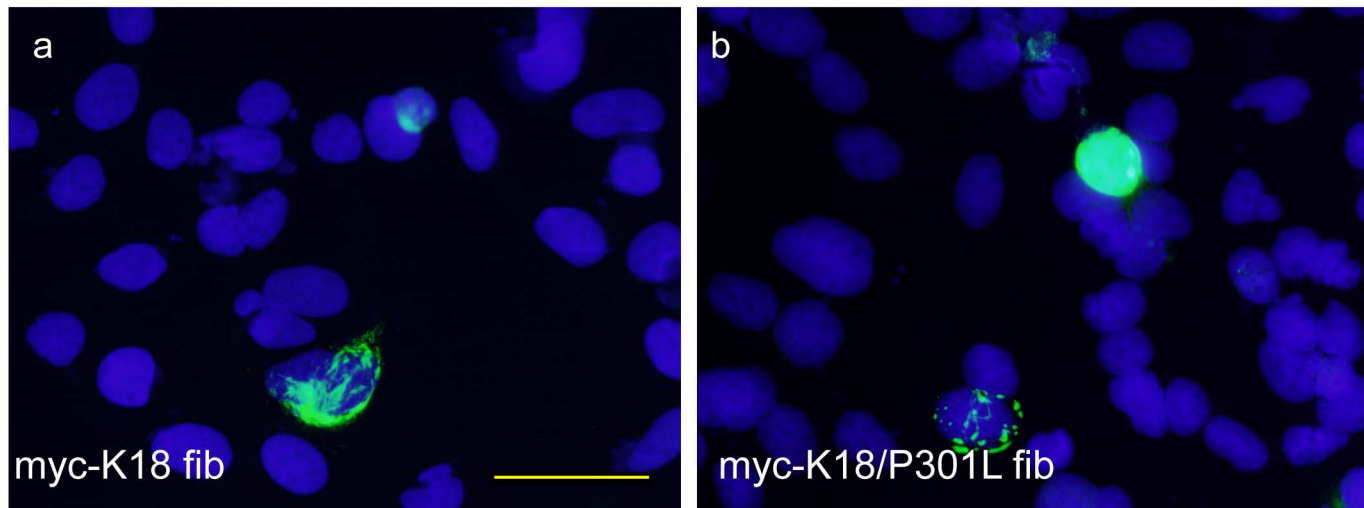

B

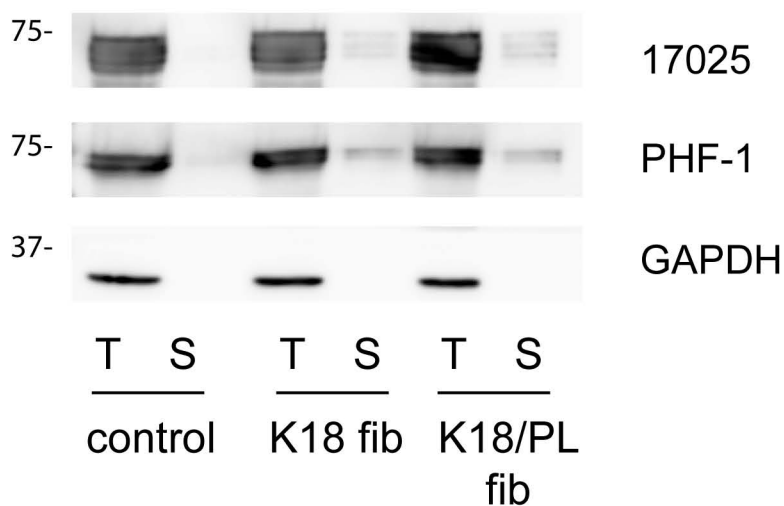

**Supplementary figure 2. (A).** Triton-insoluble tau aggregates in wtT40-transfected cells with myc-K18 (**a**) or myc-K18/P301L (**b**) fibril transduction. Green: PHF-1 staining with soluble proteins removed by 1% Triton-X100 during fixing. **(B).** Small amount of Triton-insoluble tau could be detected on western blot with both myc-K18 and myc-K18/P301L pff transduction (K18 fib and K18/PL fib respectively). T: cellular fraction recovered in 1% Triton-X lysis buffer. S: Triton-insoluble fraction solubilized in 1% SDS lysis buffer. Equal proportions of Triton and SDS fractions were loaded on SDS-PAGE gels. Magnification: 40x. Scale bar: 50  $\mu$ m.

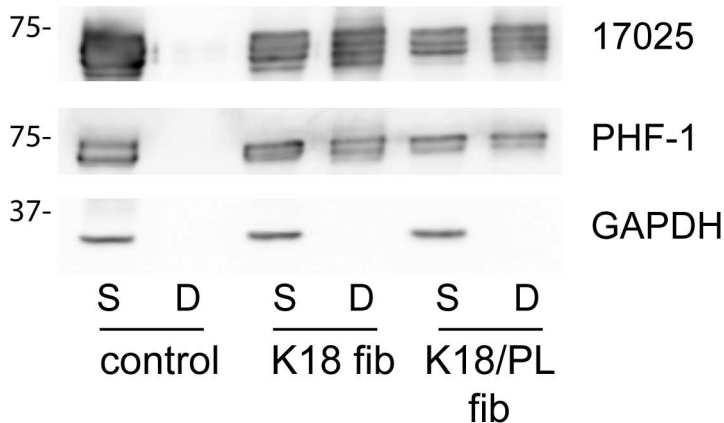

**Supplementary figure 3.** Cells transfected with T40/P301L and treated with transduction reagent alone (control) or transduced with myc-K18 or myc-K18/P301L fibrils (K18 fib and K18/PL fib respectively) with reagent were sequentially extracted with 1% Sarkosyl lysis buffer (S) followed by 1% SDS lysis buffer (D). Immunoblotting using polyclonal tau Ab 17025 and mAb phospho-tau Ab PHF-1 showed abundant Sarkosyl-insoluble tau induced by pff transduction. Equal proportions of Sarkosyl and SDS fractions were loaded on SDS-PAGE gels.

**A**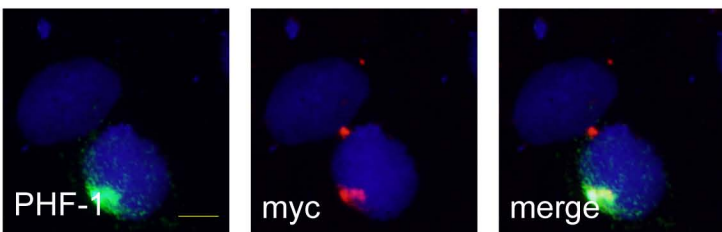**B**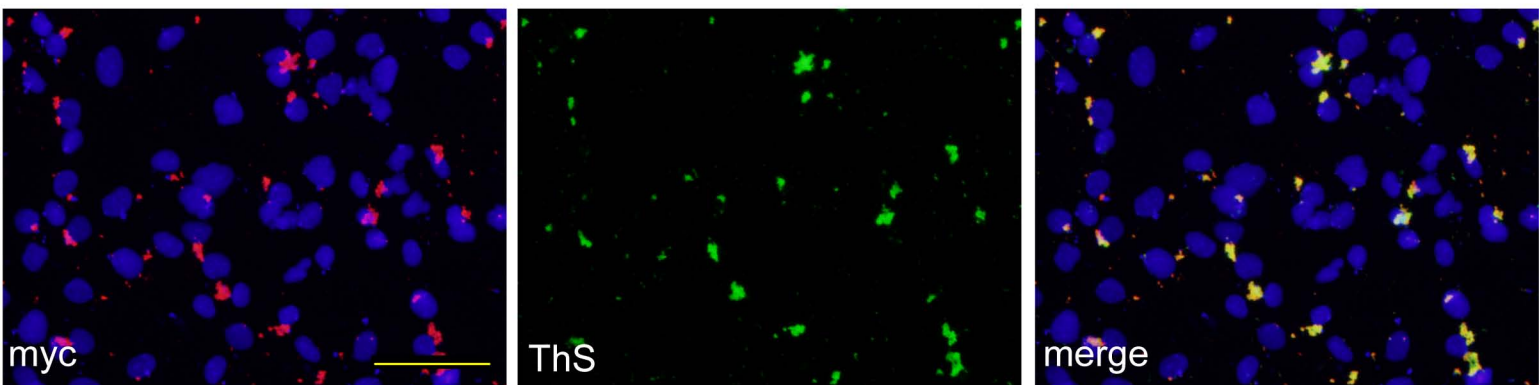

**Supplementary figure 4.** (A). One hour after the addition of myc-K18/P301L fibril/BioPORTER reagent complex to T40/P301L-transfected cells, a few rare cells showed local accumulation of insoluble tau (PHF-1) colocalizing with exogenous pffs (myc). (B). Up to  $t = 3$  hr after fibril addition, ThS staining entirely overlapped with pff staining (myc). 1% Triton-X100 was added during fixing to remove soluble proteins. Magnification: 40x for (A); 20x for (B). Scale bar: 10  $\mu\text{m}$  in (A); 100  $\mu\text{m}$  in (B).

A

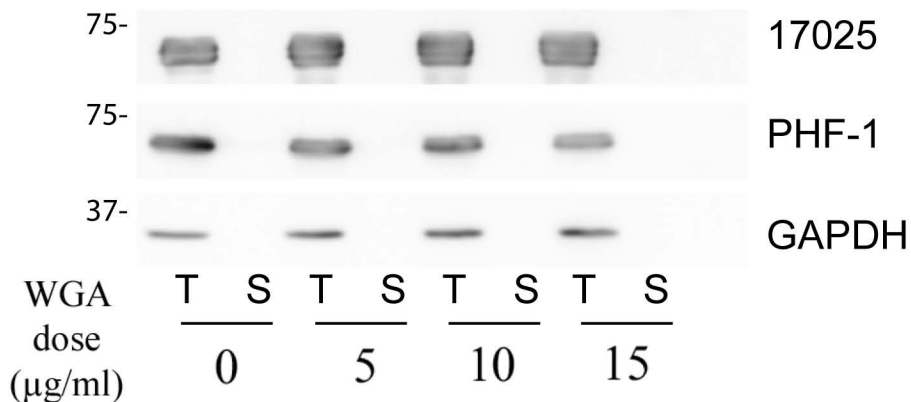

B

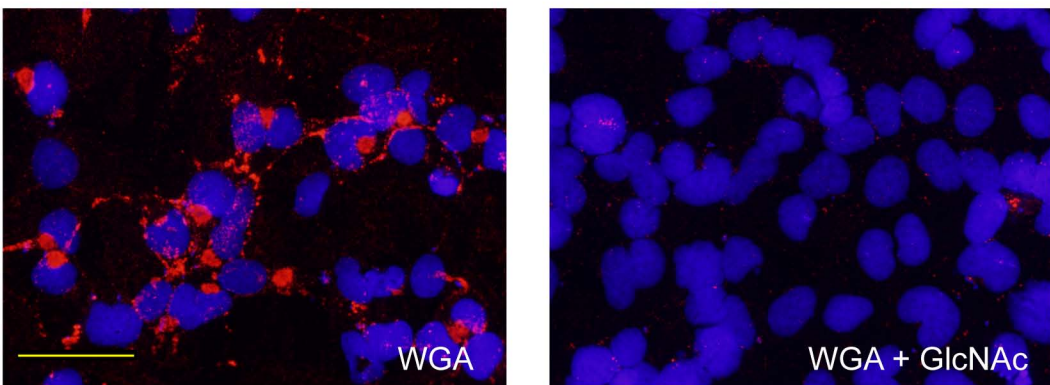

**Supplementary figure 5. (A).** Cells transiently transfected with T40/P301L mutant tau were treated with different doses of WGA. WGA did not dose-dependently increase the expression level of tau and there was no accumulation of Triton-insoluble tau without fibril transduction. T: 1% Triton-X fraction; S: 1% SDS fraction. Equal proportions of Triton and SDS fractions were loaded on SDS-PAGE. **(B).** Enhanced cellular association with pffs induced by WGA was blocked by GlcNAc treatment. Red: Pffs recognized by polyclonal anti-myc Ab. Magnification: 40x. Scale bar: 50 µm.

**Supplementary Table I. Antibodies used in the study**

| <b>Antibody</b>               | <b>Antigen</b>                            | <b>Host species</b> | <b>Dilution</b>                                                                              | <b>Source/Reference</b>                     |
|-------------------------------|-------------------------------------------|---------------------|----------------------------------------------------------------------------------------------|---------------------------------------------|
| 17025                         | Human recombinant tau                     | rabbit polyclonal   | 1:1000 (WB, ICC)                                                                             | 68                                          |
| PHF-1                         | p-Tau (phosphorylated at Ser 396 and 404) | mouse monoclonal    | 1:1000 (WB, immuno-EM); 1:2000 (ICC)                                                         | 69                                          |
| AT8                           | p-Tau (phosphorylated at Ser 202)         | mouse monoclonal    | 1:500 (ICC)                                                                                  | Innogenetics                                |
| MC-1                          | Tau in the pathological conformation      | mouse monoclonal    | 1:500 (ICC)                                                                                  | Gift from Dr. Peter Davies Lab              |
| Tau 5                         | Tau (210-230aa)                           | mouse monoclonal    | 5ug/ml as capture antibody in tau ELISA; 6ug for immunoprecipitating tau from ~100ug protein | Gift from Dr. Lester Binder Lab             |
| biotinylated BT2              | Tau (194-198aa)                           | mouse monoclonal    | 125ng/ml as reporting antibody in tau ELISA together with HT7                                | Pierce (Thermo Scientific)                  |
| biotinylated HT7              | Tau (159-163aa)                           | mouse monoclonal    | 125ng/ml as reporting antibody in tau ELISA together with BT2                                | Pierce (Thermo Scientific)                  |
| T46                           | Tau (404-441aa)                           | mouse monoclonal    | 1 ug for immunoprecipitating tau from ~100ug protein                                         | 70                                          |
| myc 9E10                      | myc tag                                   | mouse monoclonal    | 1:1000 (WB, ICC)                                                                             | Developmental Studies Hybridoma Bank (DSHB) |
| Anti-c-myc                    | c-myc tag                                 | rabbit polyclonal   | 1:5000 (regular ICC); 1:1000 (live staining)                                                 | Sigma                                       |
| GAPDH (6C5)                   | Glyceraldehyde-3-phosphate dehydrogenase  | mouse monoclonal    | 1:3000 (WB)                                                                                  | Advanced Immunochemical                     |
| 12G10                         | tubulin                                   | mouse monoclonal    | 10ug/ml as capture antibody in Ace-tub ELISA                                                 | DSHB                                        |
| Acetylated tubulin (6-11 B-1) | Acetylated-tubulin                        | mouse monoclonal    | 1:4000 (ELISA); 1:1000 (ICC)                                                                 | Sigma                                       |
